# Supplementary material for: Molten salt-assisted a-axis-oriented growth of Ta3N5 nanorod arrays with enhanced charge transport for efficient photoelectrochemical water oxidation
Source: Royal Society of Chemistry journal article supplement (doi:10.1039/c8ce01016a), 2018-01-01
Supplement: c8ce01016a1.pdf [file c8ce01016a1.pdf]

## Electronic Supplementary Information

### Molten salt-assisted $\alpha$ -axis oriented growth of $\text{Ta}_3\text{N}_5$ nanorod array with enhanced charge transport for efficient photoelectrochemical water oxidation

Zhan Shi,<sup>a,c</sup> Zhe Xu,<sup>a,b</sup> Jianyong Feng,<sup>a,b</sup> Huiting Huang,<sup>a,b</sup> Qinfeng Qian,<sup>a,b</sup> Shicheng Yan<sup>\*a,b</sup> and Zhigang Zou<sup>a,b,c</sup>

<sup>a</sup>Collaborative Innovation Center of Advanced Microstructures, Nanjing University, Nanjing, 210093, P. R. China. E-mail: yscfei@nju.edu.cn

<sup>b</sup>Eco-materials and Renewable Energy Research Center (ERERC), National Laboratory of Solid State Microstructures, College of Engineering and Applied Science, Nanjing University, Nanjing 210093, P. R. China.

<sup>c</sup>Jiangsu Key Laboratory For Nano Technology, Department of Physics, Nanjing University, Nanjing, 210093, P. R. China.

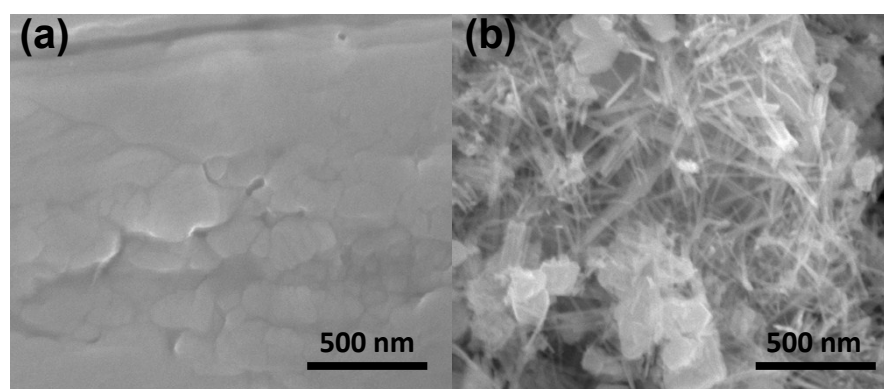

**Fig. S1** a) SEM image of the pre-oxidized Ta foil. b) SEM image of NR powder fabricated by  $\text{Ta}_2\text{O}_5$  powder and KI flux.

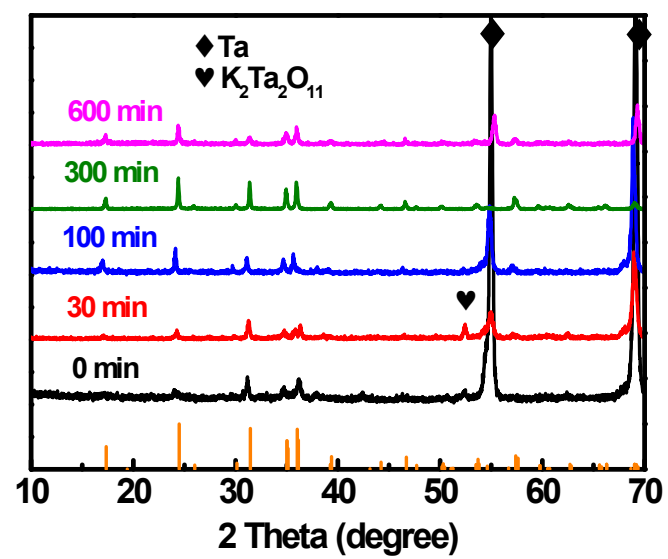

**Fig. S2** XRD patterns of the time-course experiment of the NR growth using 2 g KI flux.

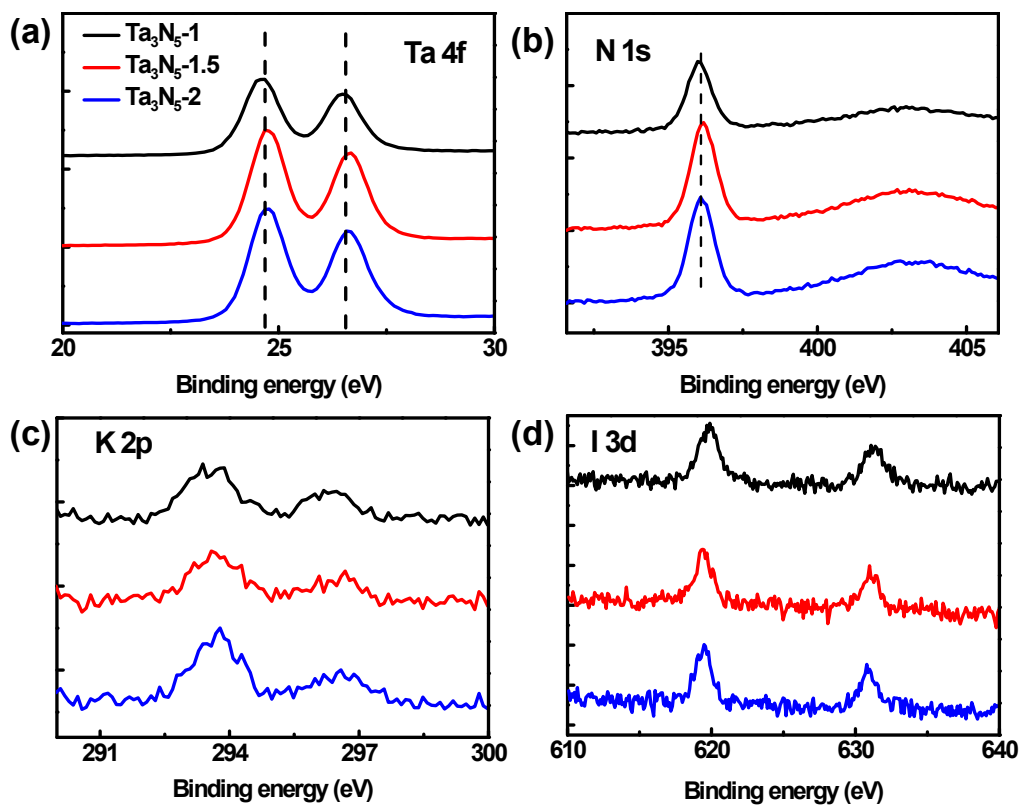

**Fig. S3** XPS spectra of **a)** Ta 4f **b)** N 1s **c)** K 2p **d)** I 3d of the as-synthesized photoanodes.

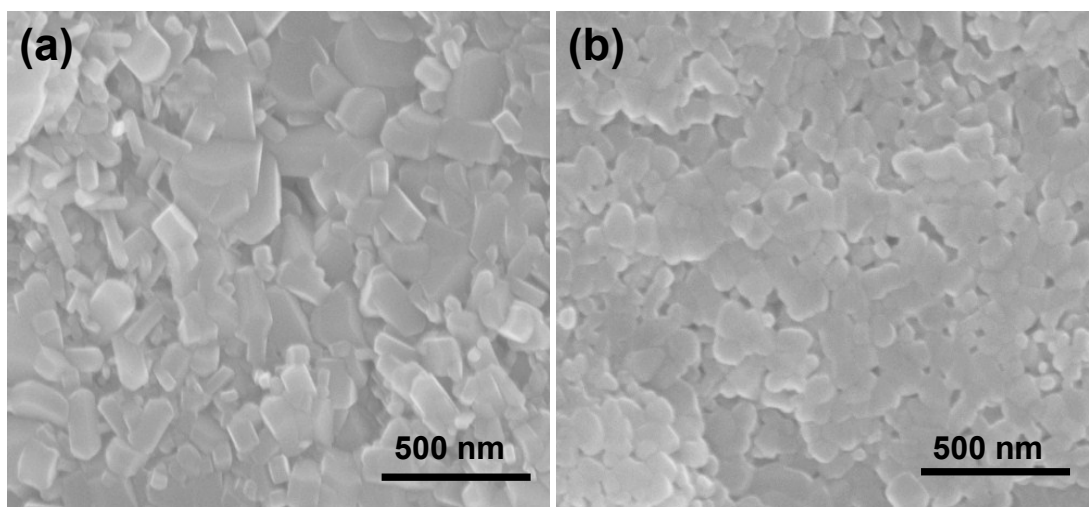

**Fig. S4** SEM images of  $\text{Ta}_3\text{N}_5$  photoanodes synthesized by using a) NaI and b) KBr as flux.

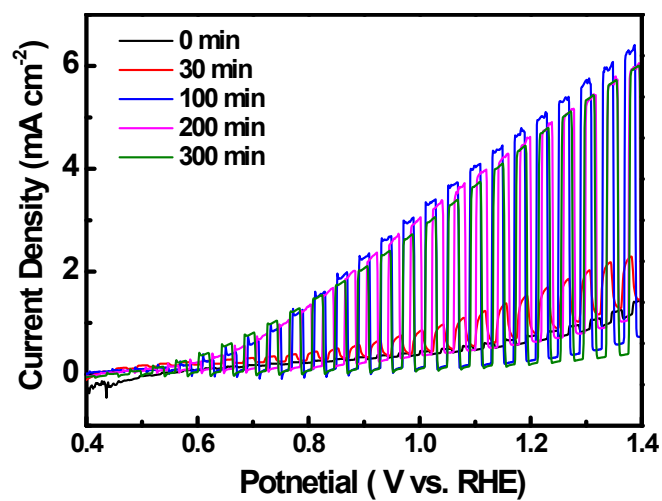

**Fig. S5** Current density-potential curves of  $\text{Ta}_3\text{N}_5$ -2 photoanodes with varied growth time.  $\text{Ni}_{0.9}\text{Fe}_{0.1}\text{OOH}$  was electrochemically deposited for 100 s as the co-catalyst for all the photoanodes.

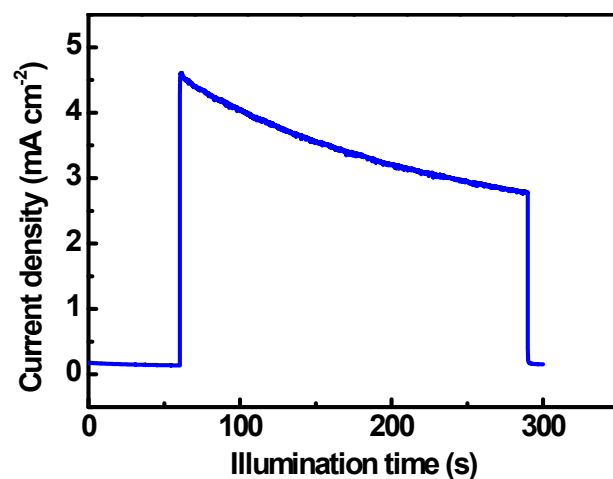

**Fig. S6** Stability test of  $\text{Ta}_3\text{N}_5$ -2 photoanode with  $\text{Ni}_{0.9}\text{Fe}_{0.1}\text{OOH}$ . The stability of  $\text{Ta}_3\text{N}_5$ -2 nanorod photoanode is not so good, which can be attributed to the surface corrosion by holes and leaky co-catalyst that does not prevent from the infiltration of electrolyte.

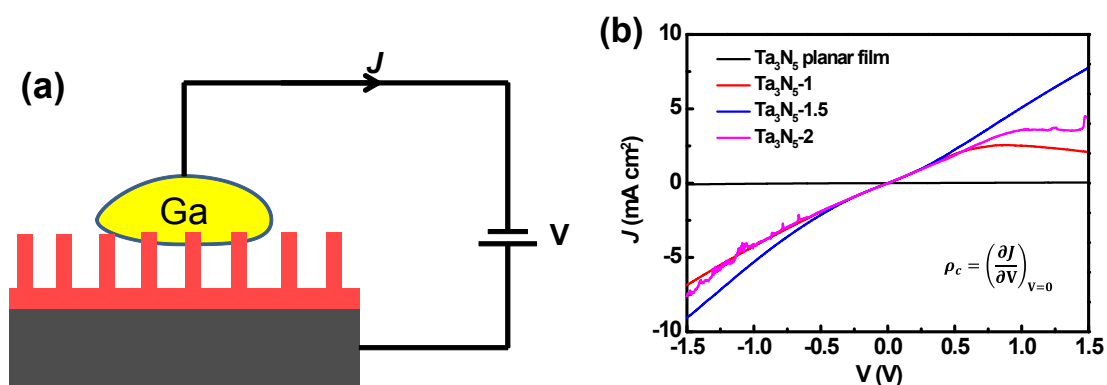

**Fig. S7** a) Schematic diagram of conductivity measurement of  $\text{Ta}_3\text{N}_5$  photoanodes. The area of Ga droplet is about  $4 \text{ mm}^2$ . b)  $J$ - $V$  curves of the conductivity

measurement. For comparison, a planar nanoparticle  $\text{Ta}_3\text{N}_5$  film of about 2  $\mu\text{m}$ -thick was fabricated with simple oxidation-nitridation method. The linearly fitted conductivities at  $V=0$  V for  $\text{Ta}_3\text{N}_5$  nanoparticle film,  $\text{Ta}_3\text{N}_5$ -1,  $\text{Ta}_3\text{N}_5$ -1.5 and  $\text{Ta}_3\text{N}_5$ -2 are 0.02, 3.61, 3.46, and 3.58  $\Omega^{-1} \text{cm}^2$ , respectively.
